# Supplementary material for: Revealing the impact of strontium doping on the optical, electronic and electrical properties of nanostructured 2H-CuFeO2 delafossite thin films
Source: Royal Society of Chemistry journal article supplement (doi:10.1039/d1ra03734j), 2021-01-01
Supplement: d1ra03734j1.pdf [file d1ra03734j1.pdf]

Supplementary Information

---

**Revealing the impact of strontium doping on the optical, electronic and electrical properties of the nanostructured 2H-CuFeO<sub>2</sub> delafossite thin films**

**Hamza Shaili<sup>a,\*</sup>, El mehdi Salmani<sup>b</sup>, Mustapha Beraich<sup>c</sup>, Abderrahim Elhat<sup>a</sup>, Mustapha Rouchdi<sup>a</sup>, M'hamed Taibi<sup>d</sup>, Hamid Ez-Zahraouy<sup>b</sup>, Najem Hassanain<sup>a</sup>, Ahmed Mzerd<sup>a</sup>**

---

<sup>a.</sup> *Group of STCE-Energy Research Center (ERC), Faculty of Science, Mohammed V University, B. P. 1014, Rabat, Morocco*

<sup>b.</sup> *Laboratory of Condensed Matter and Interdisciplinary Sciences Department of Physics, Faculty of Sciences, Mohammed V University, Rabat, Morocco.*

<sup>c.</sup> *Laboratory of Physics of Condensed Matter, Department of Physics, Ibn Tofail University, Kenitra, Morocco.*

<sup>d.</sup> *CSM, LPCMIO, Ecole Normale Supérieure, Mohammed V University, Rabat, Morocco*

---

*E-mail address: [hamza.shaili13@gmail.com](mailto:hamza.shaili13@gmail.com) (Hamza Shaili).*

## Supplementary Information

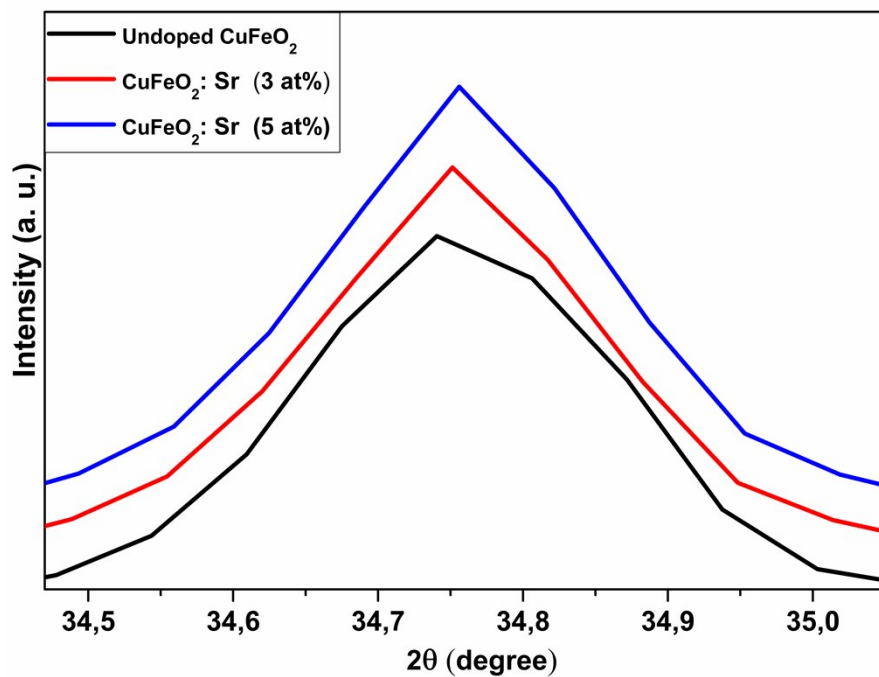

**Fig. S1** Magnified XRD peaks in the region of the (101) plane for the pure and Sr-doped  $\text{CuFeO}_2$  thin films.

**Table S1.** Structural parameters of the pure and Sr-doped  $\text{CuFeO}_2$  thin films from XRD data; Lattice parameters, Crystallite size.

| Compound                             | Space group | Lattice parameters (Å) |         | D (nm) |
|--------------------------------------|-------------|------------------------|---------|--------|
|                                      |             | a                      | c       |        |
| $\text{CuFeO}_2$                     | $P6_3/mmc$  | 3.0532                 | 11.52   | 27     |
| $\text{CuFeO}_2:\text{Sr}^{2+}$ (3%) | $P6_3/mmc$  | 3.0514                 | 11.4975 | 31     |
| $\text{CuFeO}_2:\text{Sr}^{2+}$ (5%) | $P6_3/mmc$  | 3.0496                 | 11.4802 | 48     |

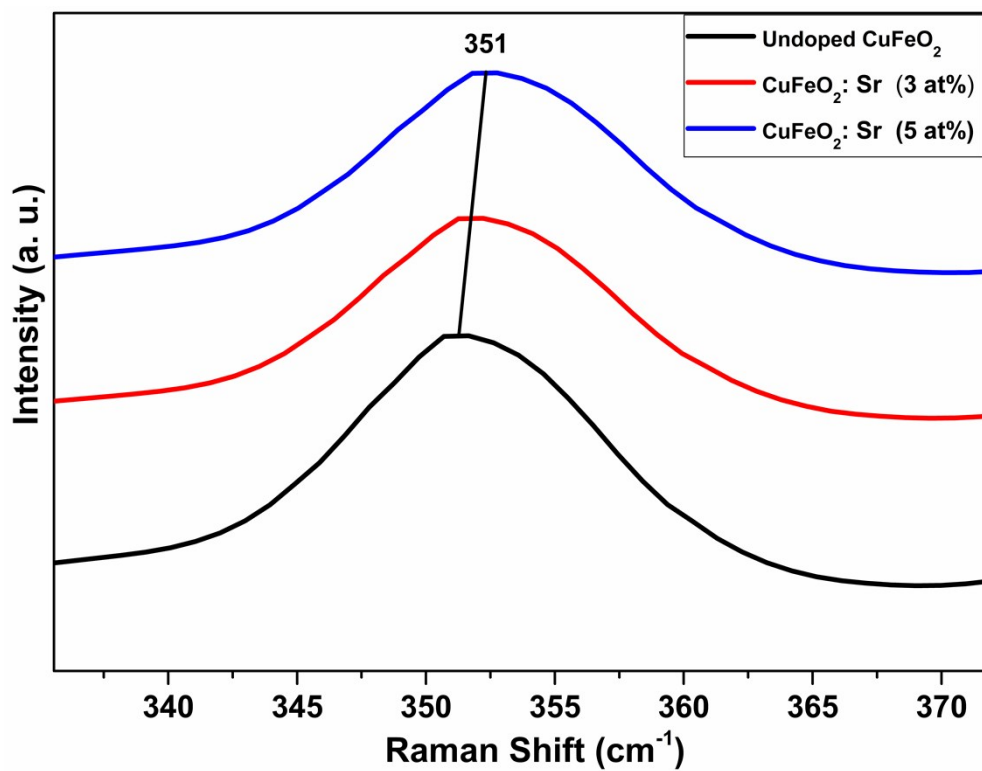

**Fig. S2** Magnified Raman signal in the region of the 351  $\text{cm}^{-1}$  mode for the pure and Sr-doped  $\text{CuFeO}_2$  thin films.

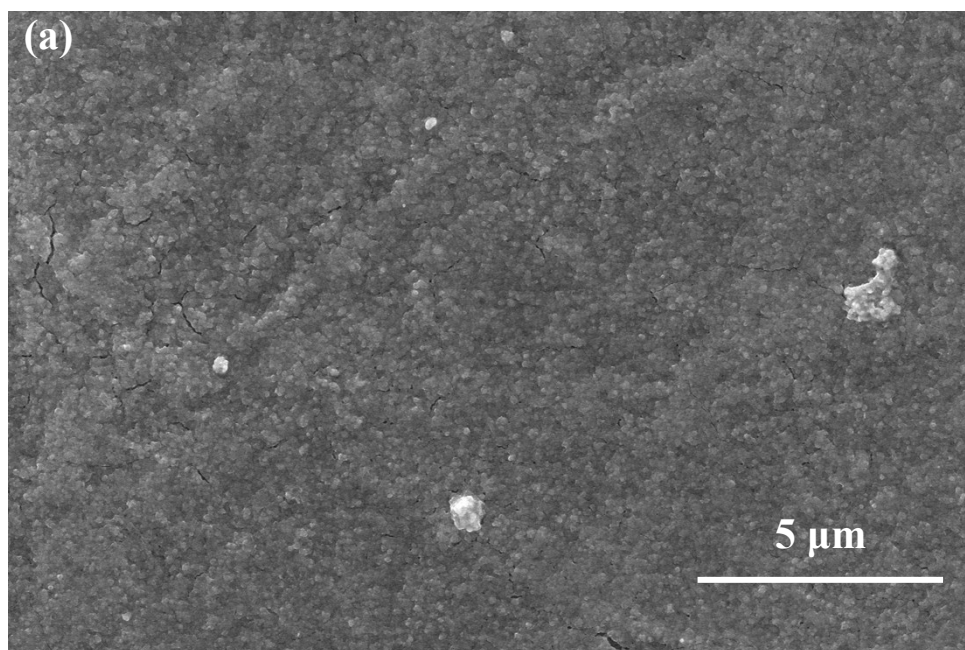

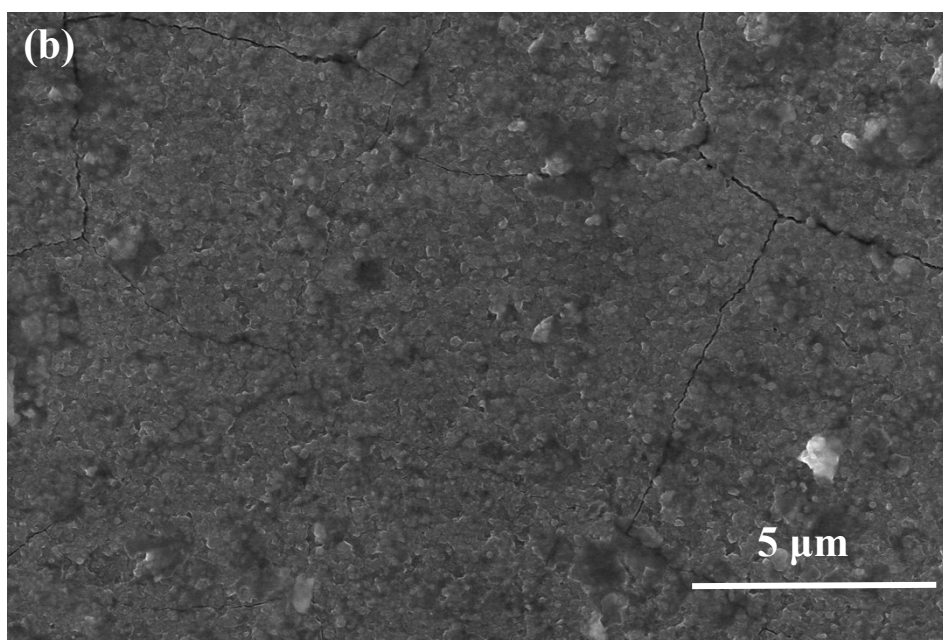

**Fig. S3** Top-view of Sr-doped  $\text{CuFeO}_2$  thin film **(a)** 3% and **(b)** 5%.

**Table S2.** Atomic concentrations of the different  $\text{Cu}_{1-2x}\text{Sr}_x\text{FeO}_2$  elements obtained by EDX analysis.

| Samples                              | Atomic percentages |       |       |      |
|--------------------------------------|--------------------|-------|-------|------|
|                                      | Cu                 | Fe    | O     | Sr   |
| $\text{CuFeO}_2$                     | 24.34              | 24.59 | 51.07 | 0    |
| $\text{CuFeO}_2:\text{Sr}^{2+}$ (3%) | 23.10              | 24.58 | 51.61 | 0.71 |
| $\text{CuFeO}_2:\text{Sr}^{2+}$ (5%) | 21.76              | 24.20 | 52.94 | 1.10 |

### Supplementary Information

---

**Table S3.** Conductivity type, carrier concentration, mobility and resistivity value of the pure and Sr-doped CuFeO<sub>2</sub> thin films.

| Samples                                   | Type of conductivity | Carrier concentration (Cm <sup>-3</sup> ) | Mobility $\mu$ (cm <sup>2</sup> V <sup>-1</sup> s <sup>-1</sup> ) | Resistivity ( $\Omega$ cm) |
|-------------------------------------------|----------------------|-------------------------------------------|-------------------------------------------------------------------|----------------------------|
| CuFeO <sub>2</sub>                        | p                    | 5.7.10 <sup>16</sup>                      | 7.9                                                               | 4.9                        |
| CuFeO <sub>2</sub> :Sr <sup>2+</sup> (3%) | p                    | 4.1.10 <sup>16</sup>                      | 9.5                                                               | 4.3                        |
| CuFeO <sub>2</sub> :Sr <sup>2+</sup> (5%) | p                    | 3.6.10 <sup>16</sup>                      | 12.1                                                              | 3.5                        |
